# Supplementary material for: Targeted Next-Generation Sequencing Identifies Separate Causes of Hearing Loss in One Deaf Family and Variable Clinical Manifestations for the p.R161C Mutation in SOX10
Source: Neural Plast. 2020 Aug 28;2020:8860837. doi: 10.1155/2020/8860837 (PMC7474784; doi:10.1155/2020/8860837)
Supplement: Supplementary Materials — Supplementary Table S1: a list of 415 deafness-related genes included in the targeted gene panel. Supplementary Table S2: candidate variants identified by targeted NGS in the proband VI-1 and her parents III-1 and III-2. Supplementary Table S3: primers used in this study. [file 8860837.f1.zip]

Archive with 1 entries (1 files):
- 8860837.f1.docx
